# Supplementary material
Source: PubMed Central journal article supplement (PMC10615862)
Supplement: NIHMS1928891-supplement-Unedited_blot_for_Figure_1.pdf [file NIHMS1928891-supplement-Unedited_blot_for_Figure_1.pdf]

| Lane   | 1      | 2                 | 3    | 4                   | 5   | 6                   | 7   | 8                  | 9   | 10                | 11  | 12                | 13  | 14               | 15  |
|--------|--------|-------------------|------|---------------------|-----|---------------------|-----|--------------------|-----|-------------------|-----|-------------------|-----|------------------|-----|
| Sample | Ladder | 428               | 5606 | RF1                 | RF3 | CF1                 | CF2 | TF1                | TF2 | RM1               | RM2 | CM2               | CM3 | TM1              | TM2 |
|        |        | Control, no PCSK9 |      | Rest + PCSK9 Female |     | Corn + PCSK9 Female |     | TMX + PCSK9 Female |     | Rest + PCSK9 Male |     | Corn + PCSK9 Male |     | TMX + PCSK9 Male |     |

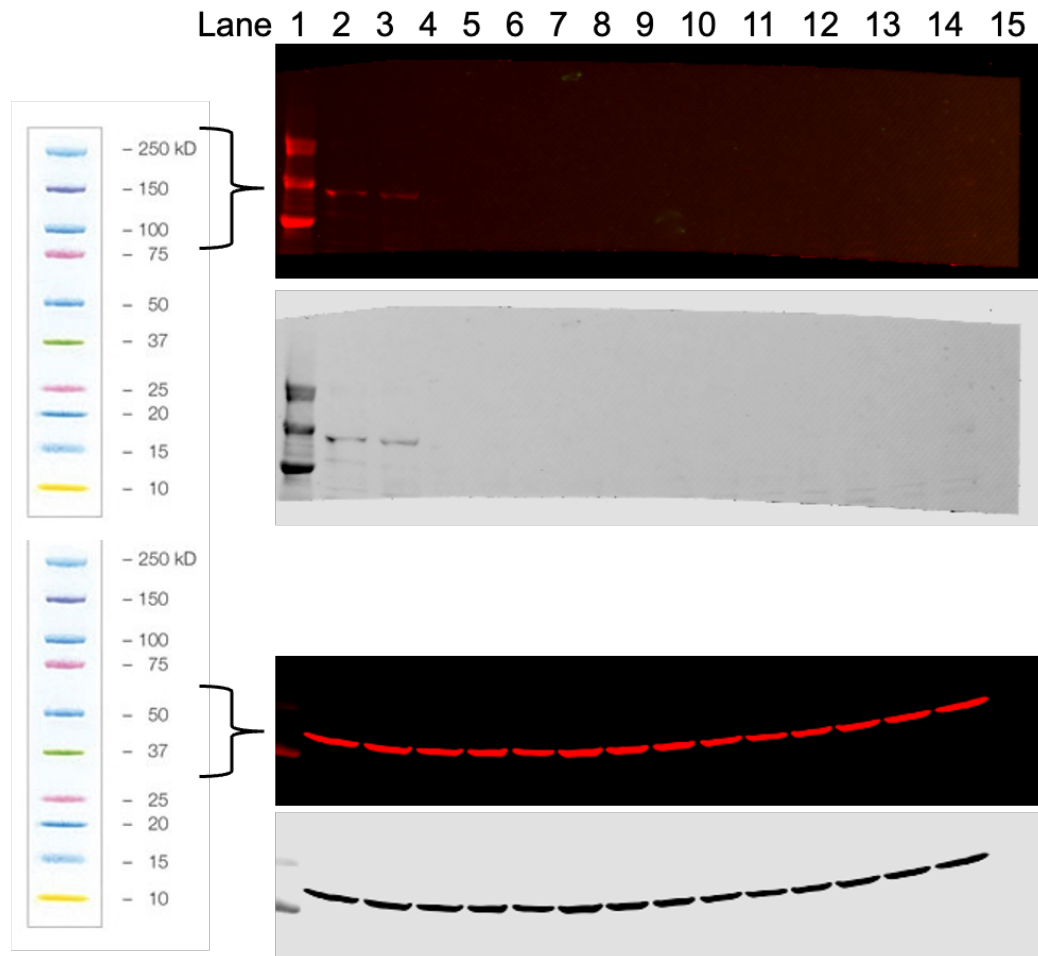

**Full Unedited Blot for Figure 1C.**

Blot was scanned on Odyssey CLx. The images here represent a single blot that was cut in half at 75 kDa. Each half of the blot was scanned separately. Ladder is Precision Plus Protein™ Kaleidoscope™ Prestained Protein Standards #1610375. The top half of the blot was stained for LDLR (BioVision, Catalog: 3839-100, Lot: 7B04L38390, rabbit polyclonal to LDL receptor, 1:1,000 dilution). Visible ladder represents 250, 150, 100 kDa. The bottom half was stained for β-actin as a loading control (Sigma, Catalog: A5441, mouse monoclonal to β-actin, 1:60,000 dilution). Visible ladder represents 50, 37 kDa. All lanes in the unedited blot directly correspond to those shown in Figure 1C.
